# Supplementary material
Source: publisher figshare collection journal article supplement (https://frontiersin.figshare.com/ndownloader/files/17762036)
Supplement: Supplementary file [file 17762036]

### Genetic map

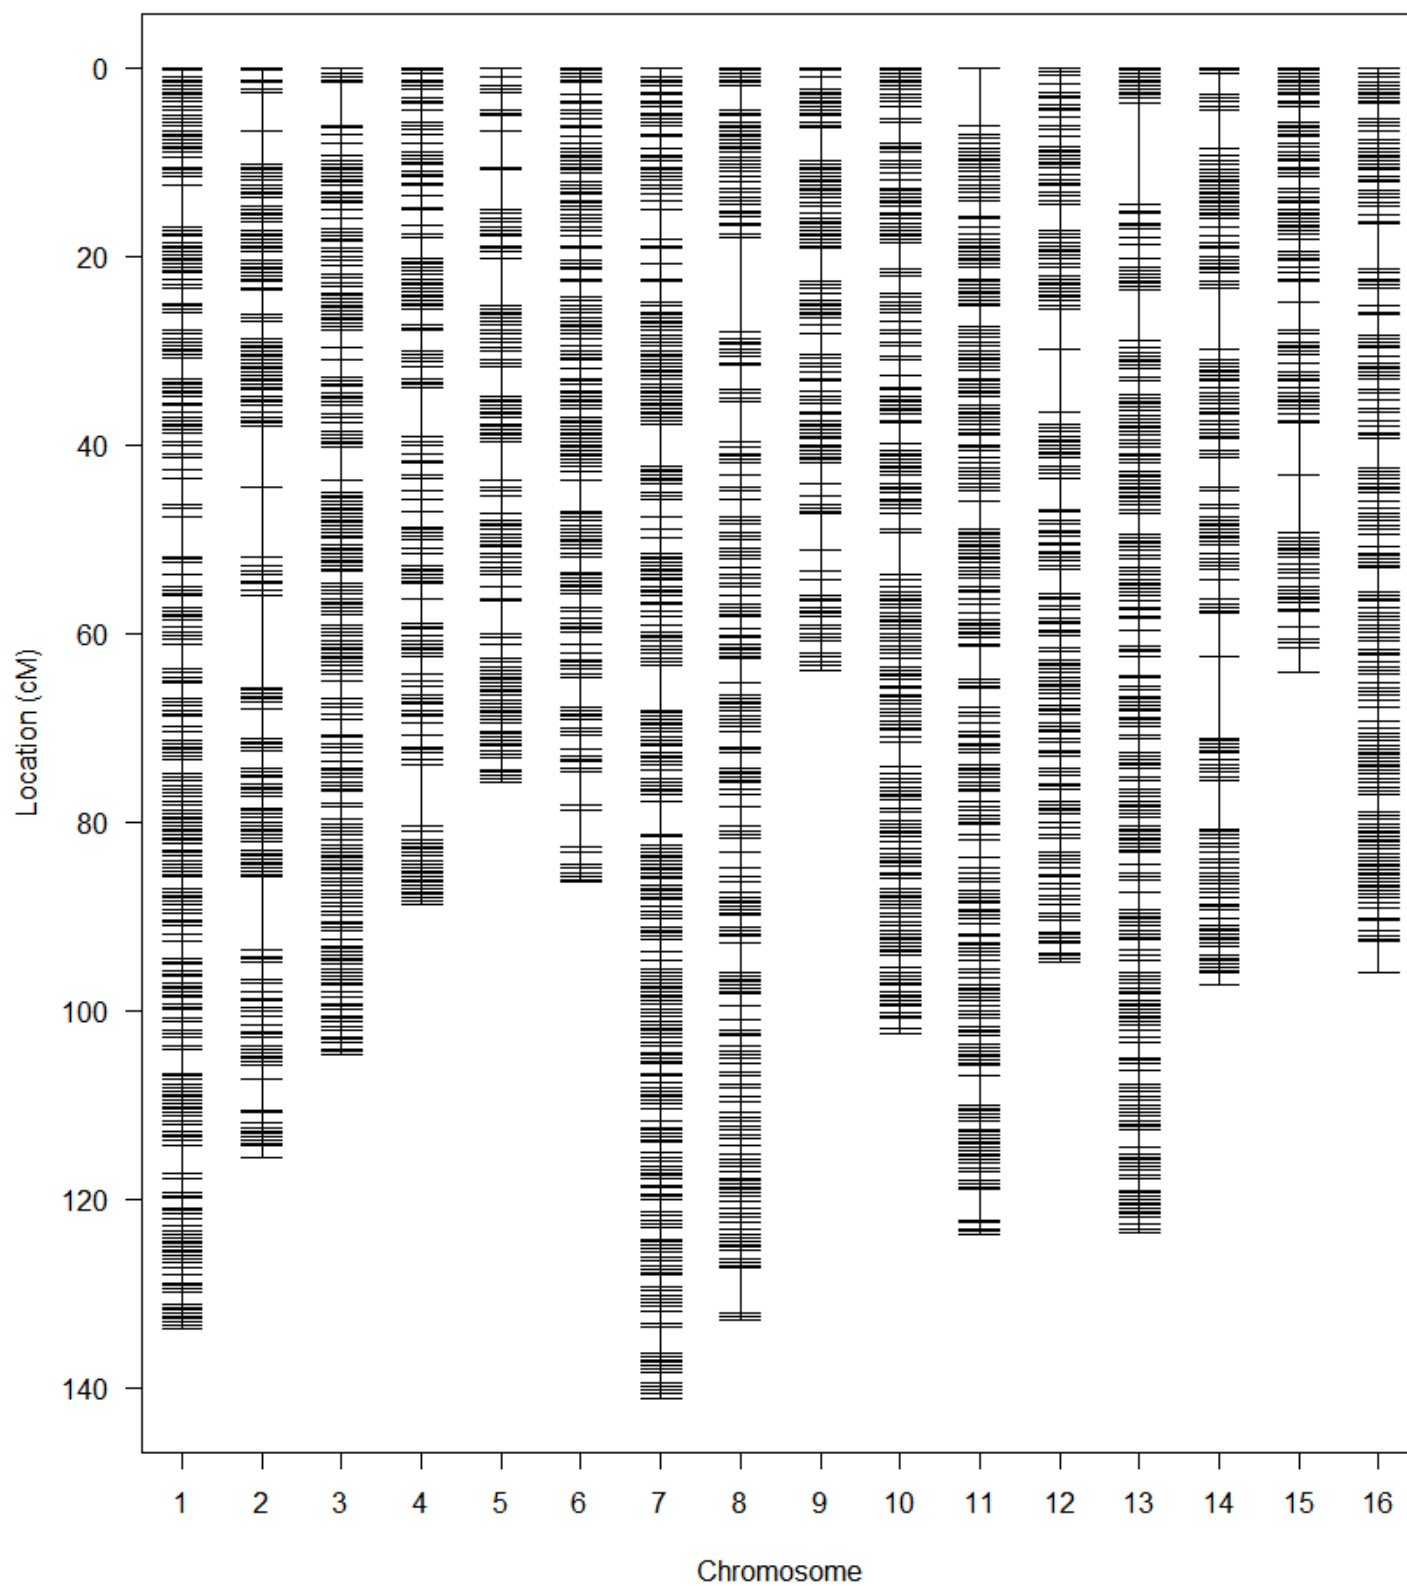

**Supplementary Figure S4.** Genetic map of Idaho.
